# Supplementary material
Source: HighWire-hosted journal article supplement (doi:10.1101/rna.080960.126)
Supplement: Supplemental_Material.docx [file Supplemental_Material.docx]

**Supplementary Figures**


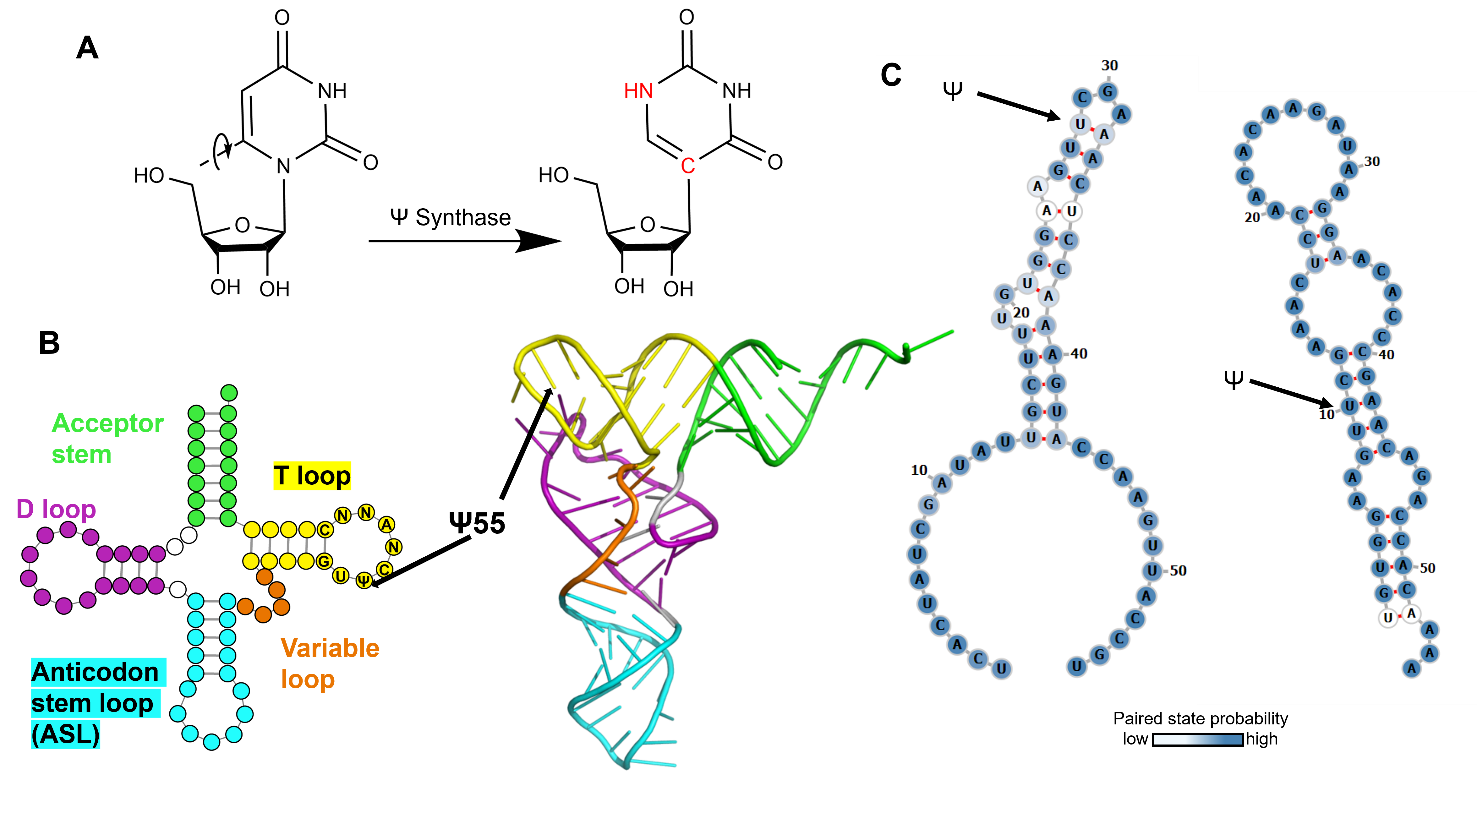


**Supplementary Figure 1**. **Pus4 catalyzes the isomerization of U to Ψ on tRNAs and other RNAs.** (*A*) Schematic of the isomerization of uridine to pseudouridine. Changes are colored in red. (*B*) Typical tRNA secondary and tertiary structure showing Ψ55 and the Pus4 consensus sequence. (*C*) Predicted secondary structures (RNAFold) (Lorenz et al. 2011) of TEF1 truncations that Pus4 was shown to modify *in vitro* (Lovejoy et al. 2014). The predictions are colored by base pairing probability.


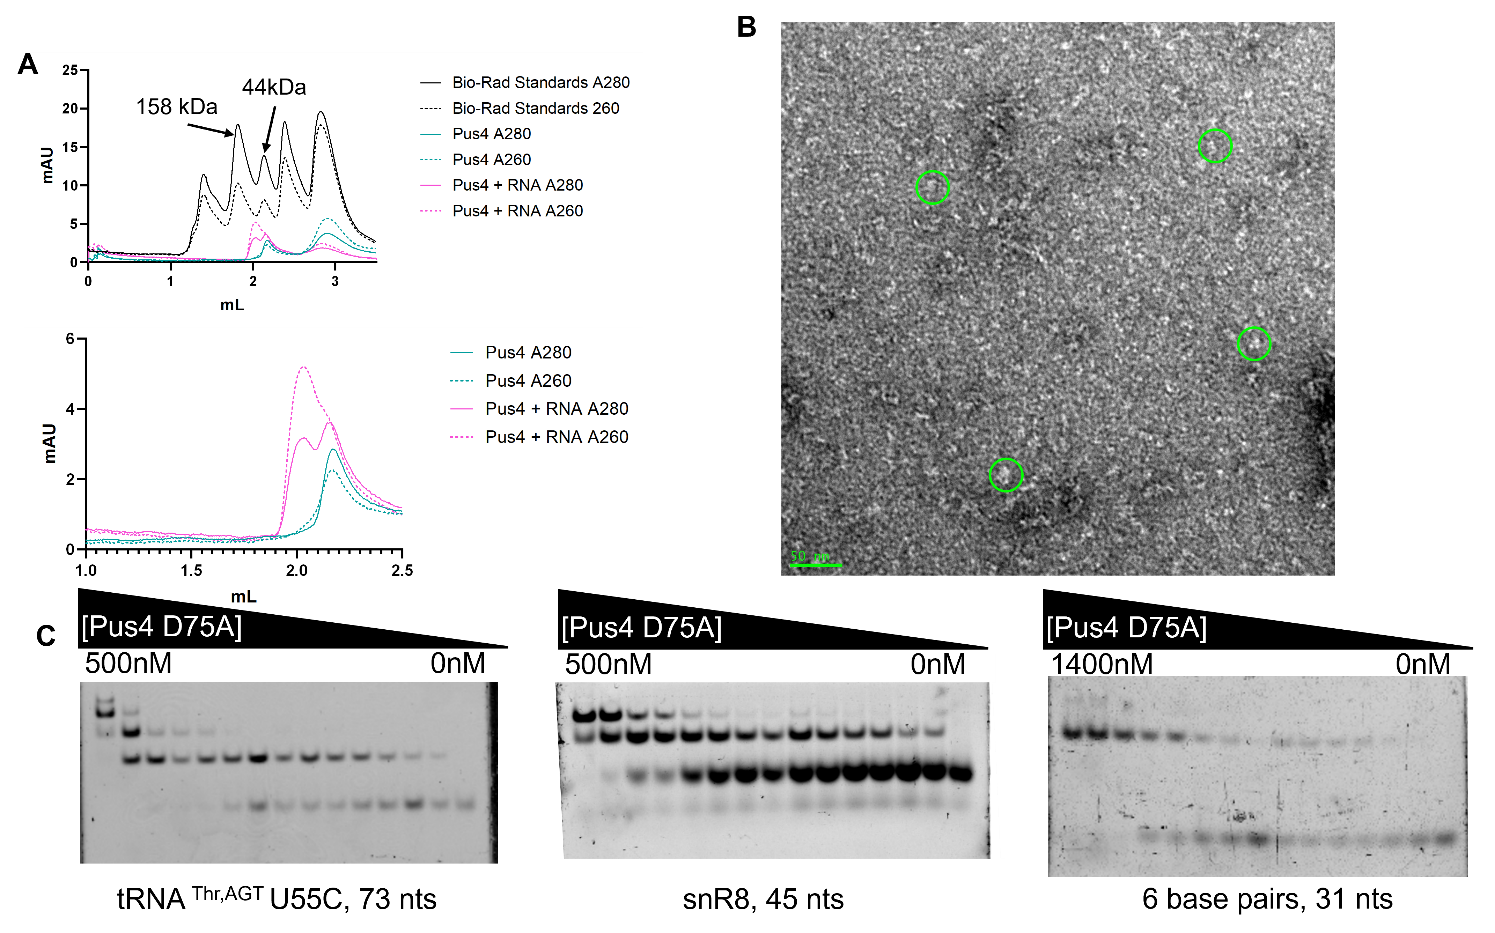


**Supplementary Figure 2. Pus4 does not form oligomers upon RNA binding.** (*A*) Analytical size exclusion traces of Bio-Rad Standards, Pus4, and Pus4 plus RNA (Protein:RNA is 10:1, the substrate is GTF3C2 with a U to C mutation). The column used was a Superdex 200 5/150 GL. (*B*) Negative stain images of Pus4 plus *S. cerevisiae* tRNAThr,AGT. Refolded RNA was added at a 1.2:1 RNA:protein ratio and the complex is about 1mg/mL. Images were taken on a Morgagni transmission electron microscope. Particles likely to be Pus4 or a Pus-RNA complex are circled in green. (*C*) Representative EMSA gel images with RNAs of different lengths, showing that more binding events are seen on longer RNAs.


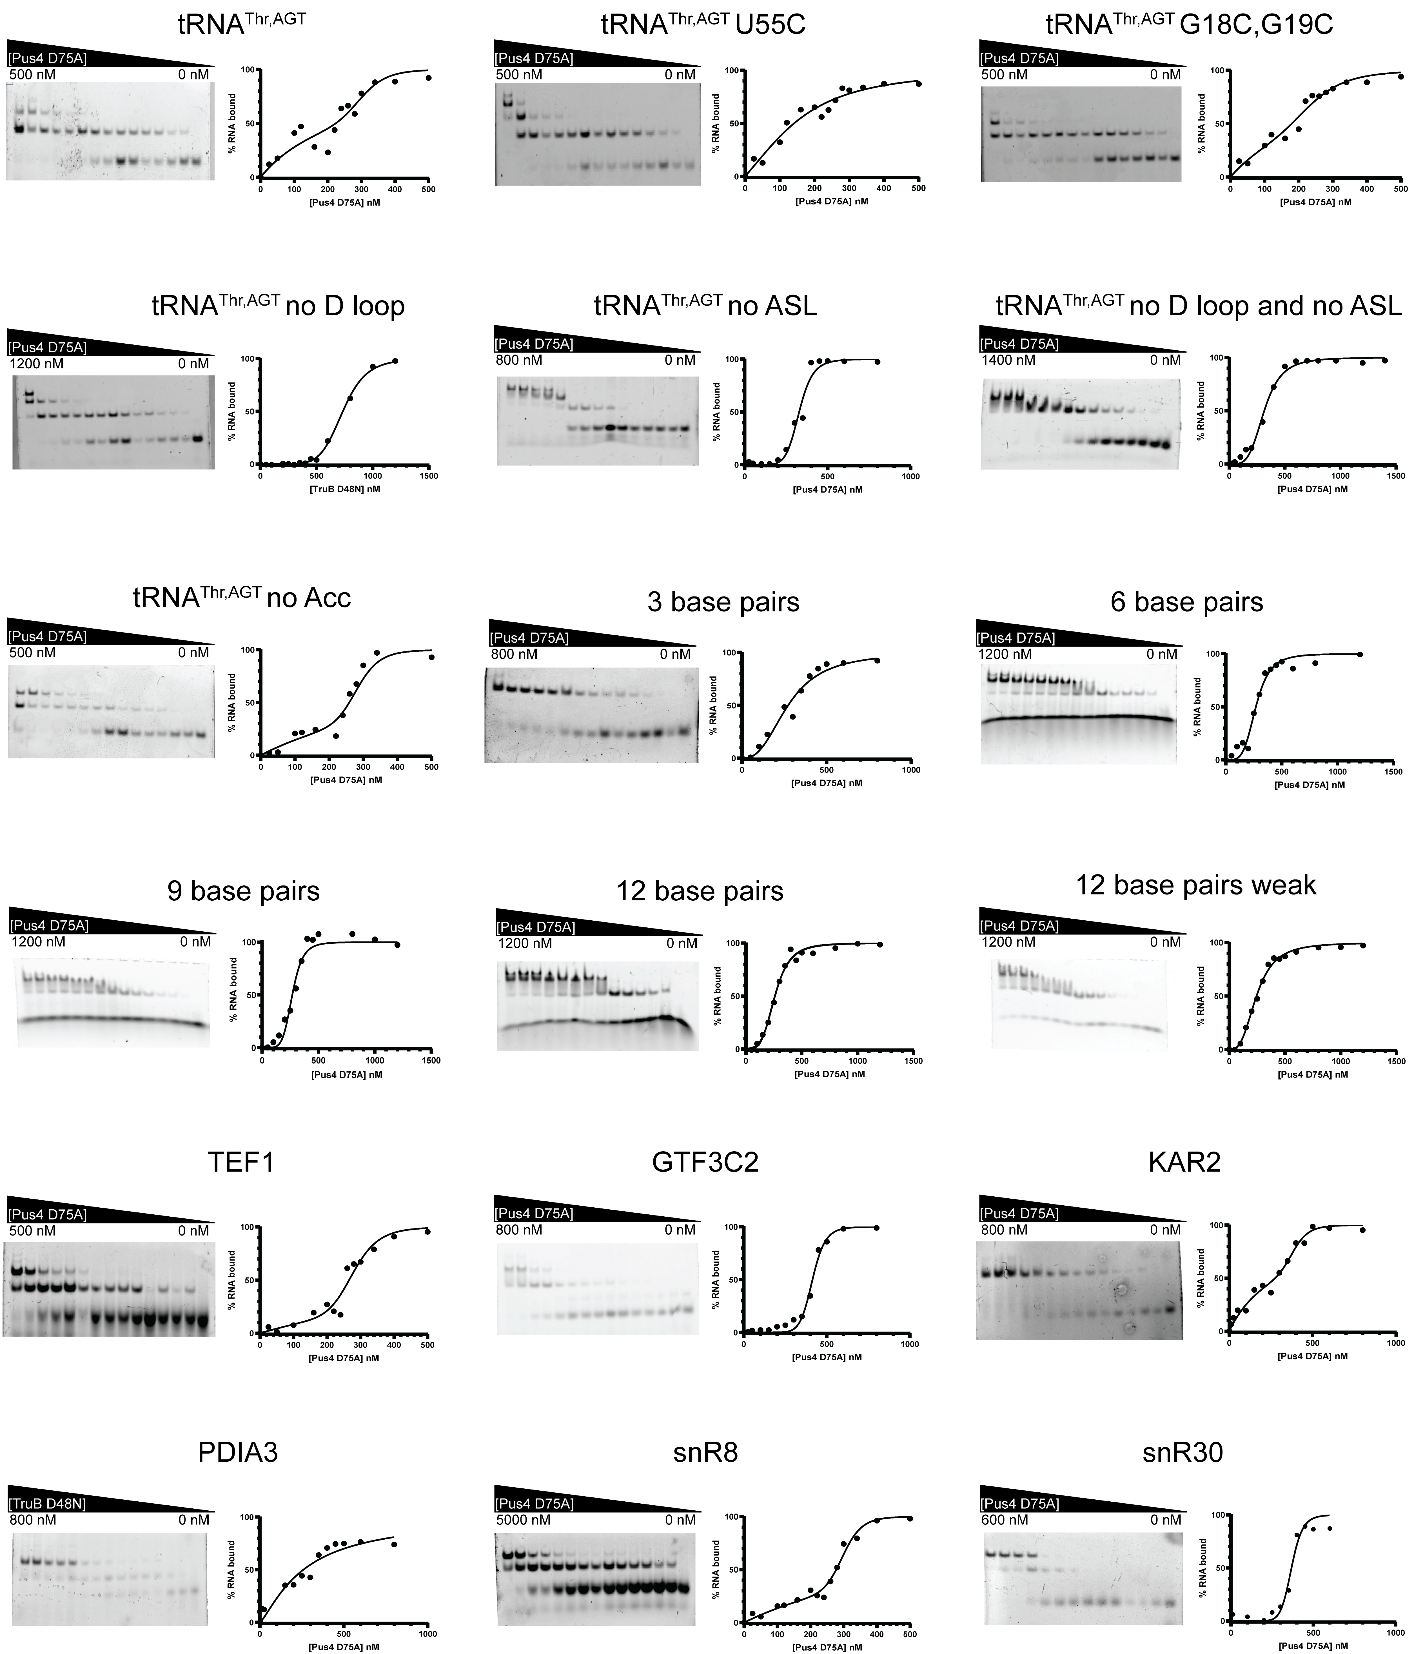


**Supplementary Figure 3. Pus4 representative EMSAs.** A representative EMSA is shown for each RNA that binding was measured on, along with a representative fit. KDs can be found in Supplementary Table 1.


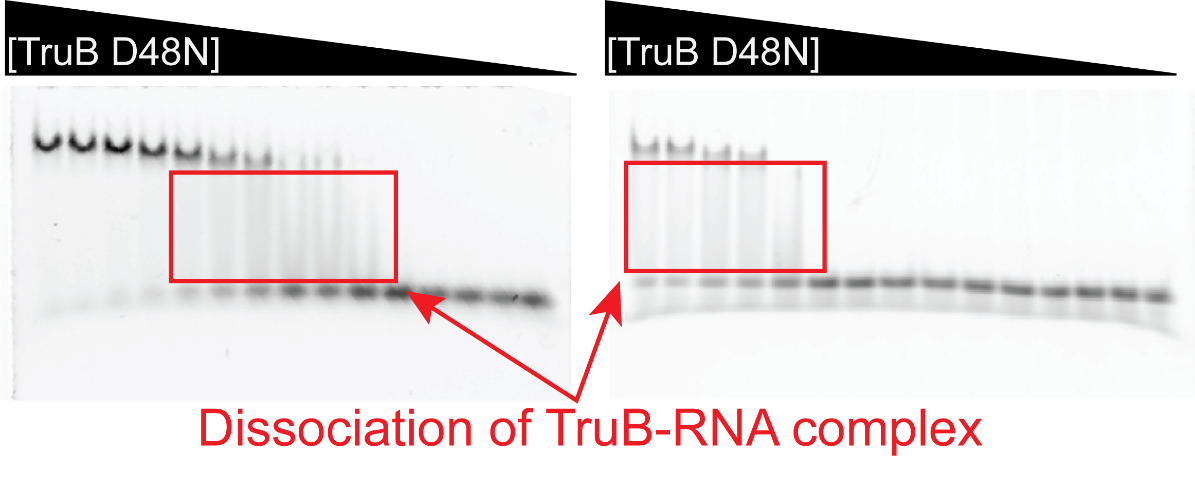


**Supplementary Figure 4.** **The TruB-RNA complex dissociates in a native gel.** Representative EMSAs of TruB D48N binding to snR8 (left) and tRNAThr,AGT no D loop showing smears (boxed in red) that indicate dissociation of the TruB-RNA complex.


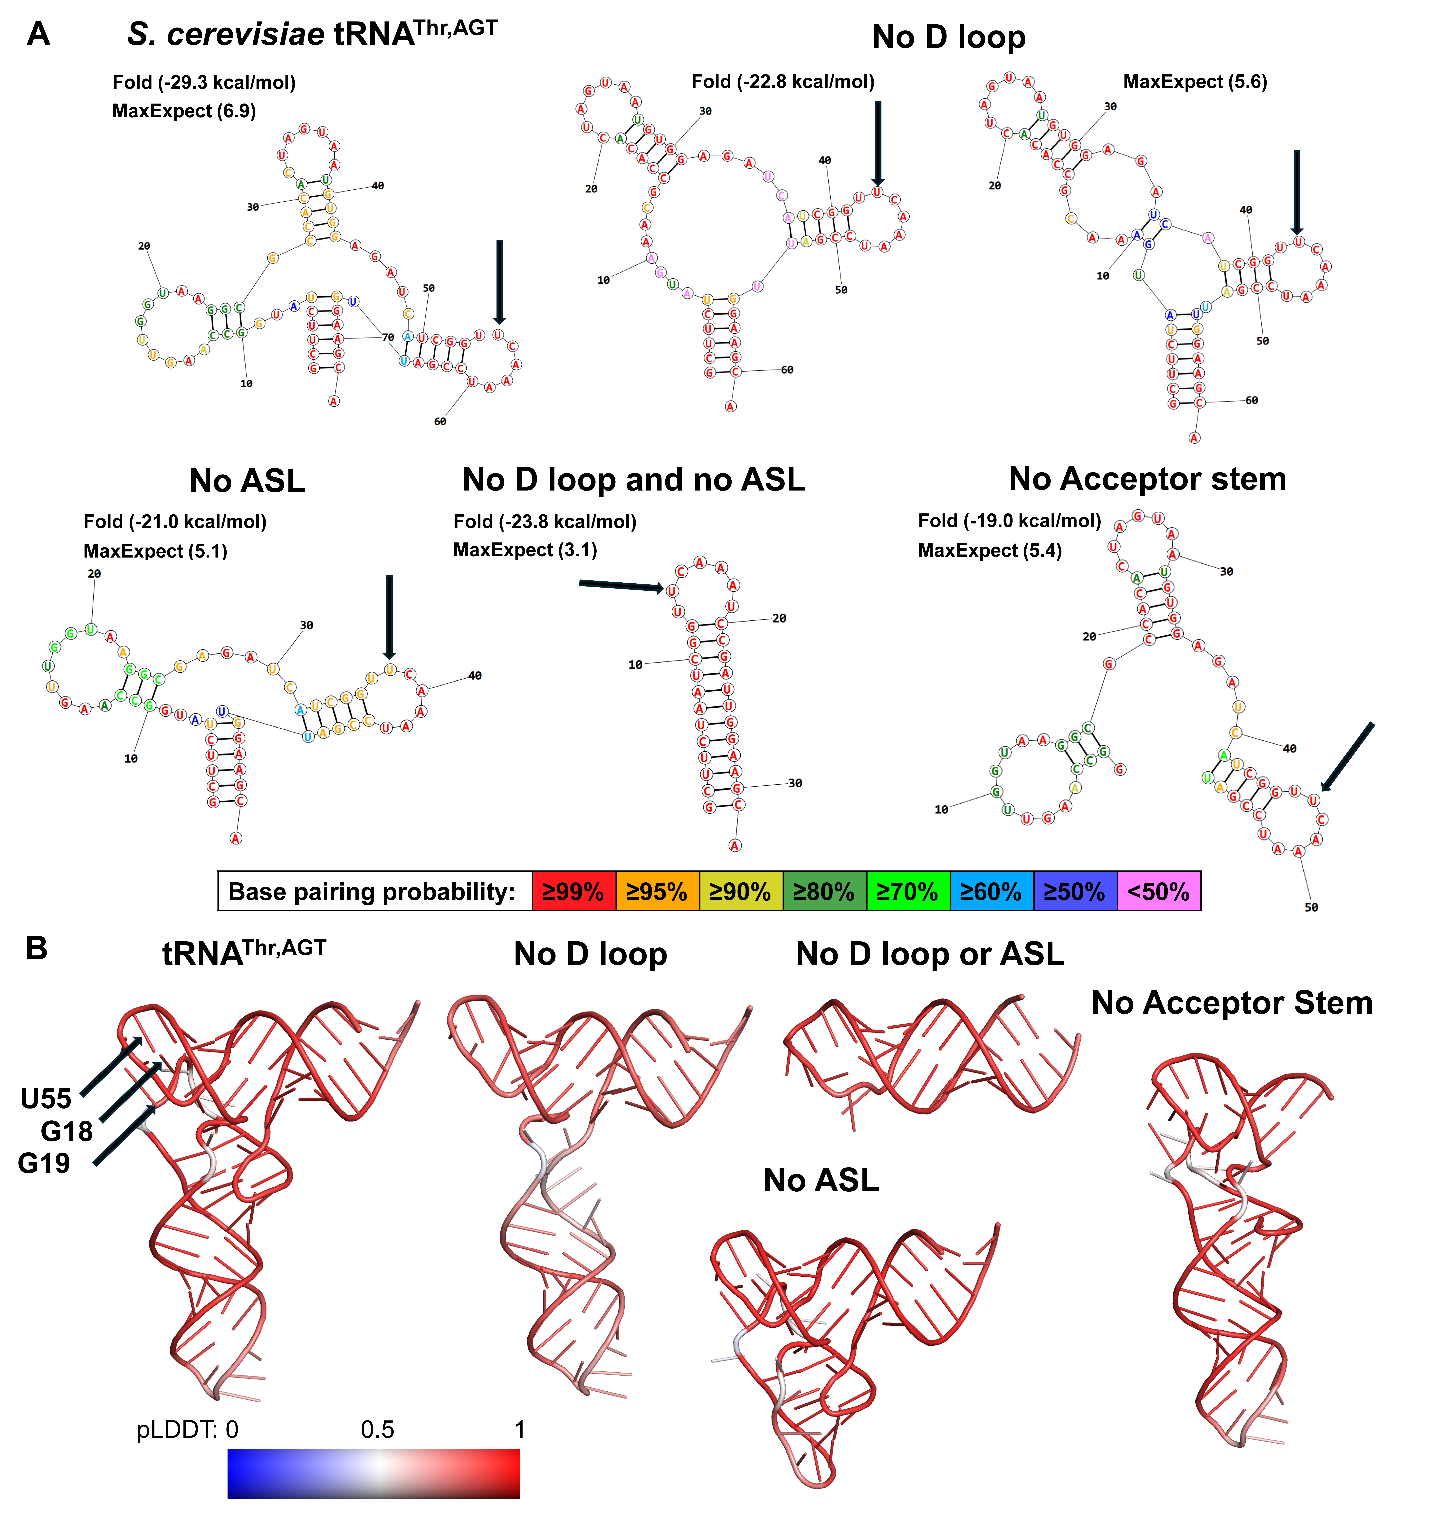


**Supplementary Figure 5. Predicted structures of tRNA variants**. (*A*) Predicted secondary structures of tRNA variants using the Fold and MaxExpect algorithms from the RNAStructure web server (Reuter and Mathews 2010). If both algorithms predicted the same structure, only one structure is shown. Bases are colored by base pairing probability and the arrow indicates the site of expected pseudouridylation. The theoretical free energy of the fold predicted by the Fold calculation is displayed in addition to the MaxExpect score (Lu et al. 2009). (*B*) Tertiary structures of tRNA variants predicted with Boltz-2(Passaro et al. 2025). The predictions are colored by confidence score (pLDDT).


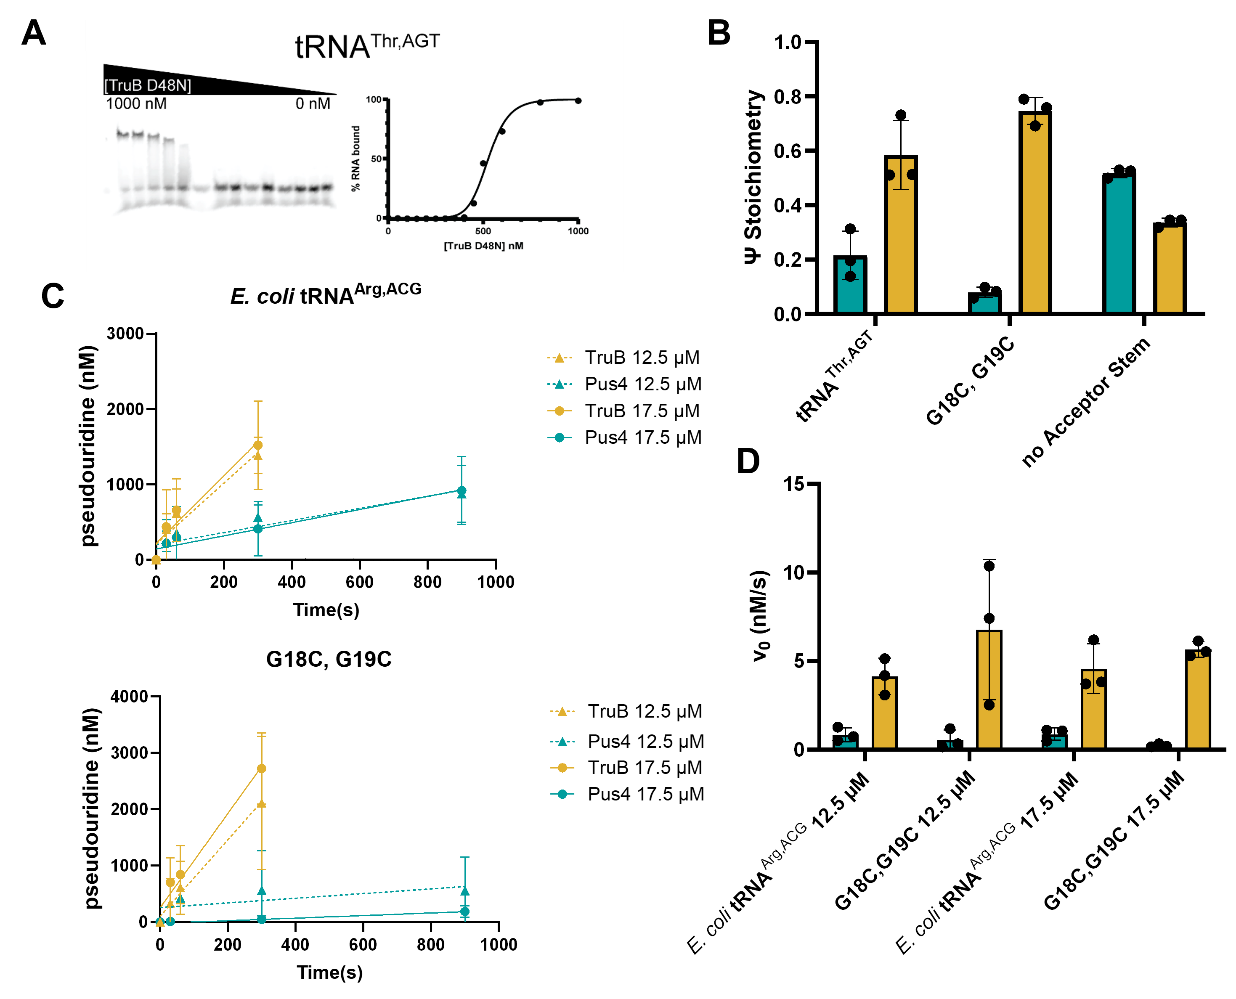


**Supplementary Figure 6. TruB modifies tRNA variants at moderately different rates.** (*A*) Representative TruB EMSA for tRNAThr,AGT. (*B*) Fraction of modification for Pus4 (teal) and TruB (gold) on stem length variants after 5 minutes, displayed as mean ± SD. The Ψ/U ratio was detected via LC-MS/MS. (*C*) Multiple turnover kinetics traces for E. coli tRNAArg,ACG and G18C, G19C. 50 nM Pus4 (teal) and TruB (gold) was incubated with 12.5uM or 17.5uM RNA. The Ψ was determined via LC-MS/MS. (*D*) Initial velocities for traces shown in c. displayed as mean ± SD.


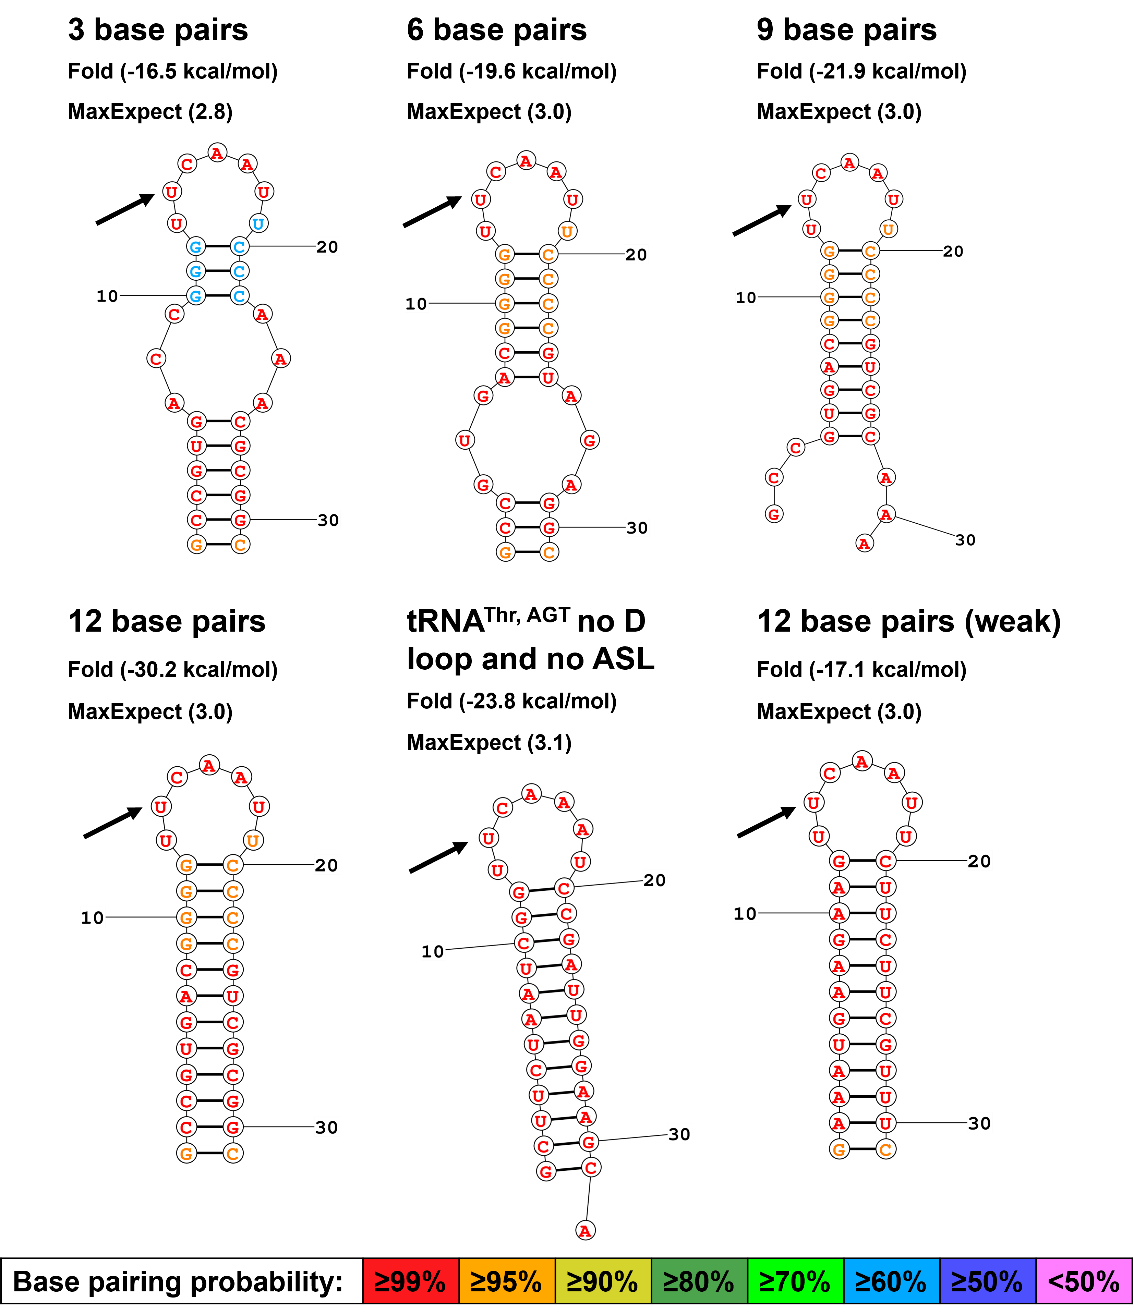


**Supplementary Figure 7. Predicted structures of stem length variants.** Predicted secondary structures of stem length variants using the Fold and MaxExpect algorithms from the RNAStructure web server (Reuter and Mathews 2010). Because both algorithms predicted the same structure for each RNA, only one structure is shown. Bases are colored by base pairing probability and the arrow indicates the site of expected pseudouridylation. The theoretical free energy of the fold predicted by the Fold calculation is displayed in addition to the MaxExpect score (Lu et al. 2009).


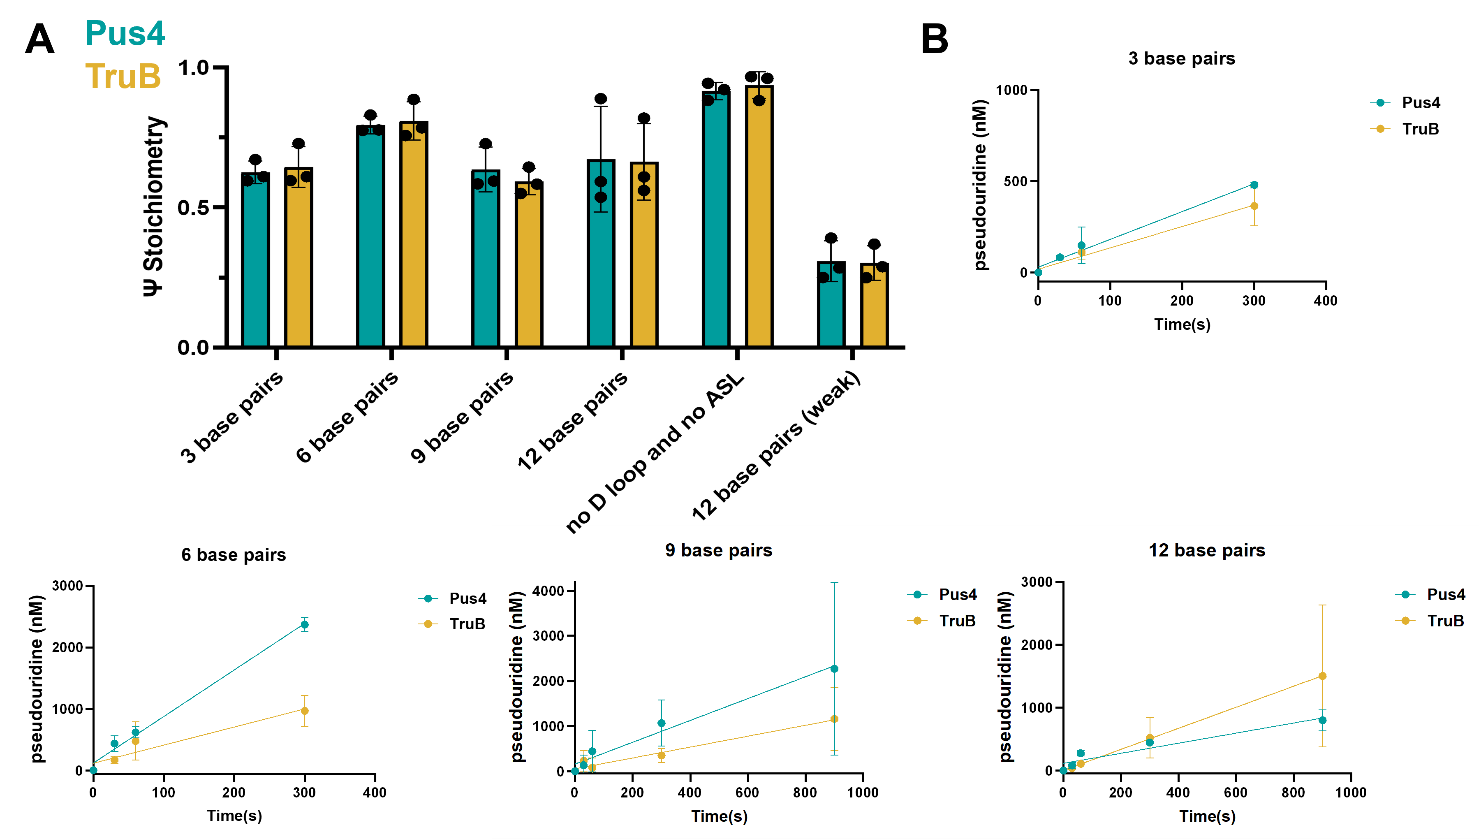


**Supplementary Figure 8. Pus4 and TruB robustly modify stem length variants.** (*A*) Fraction of modification for Pus4 (teal) and TruB (gold) on stem length variants after 30 minutes, displayed as mean ± SD. The Ψ/U ratio was detected via LC-MS/MS and each value was normalized to the Pus4 average. Statistical significance was determined by an unpaired, two-tailed t-test. No significant differences between Pus4 and TruB for each substrate were found. (*B*) Kinetic traces for multiple turnover kinetics shown in Figure 3.


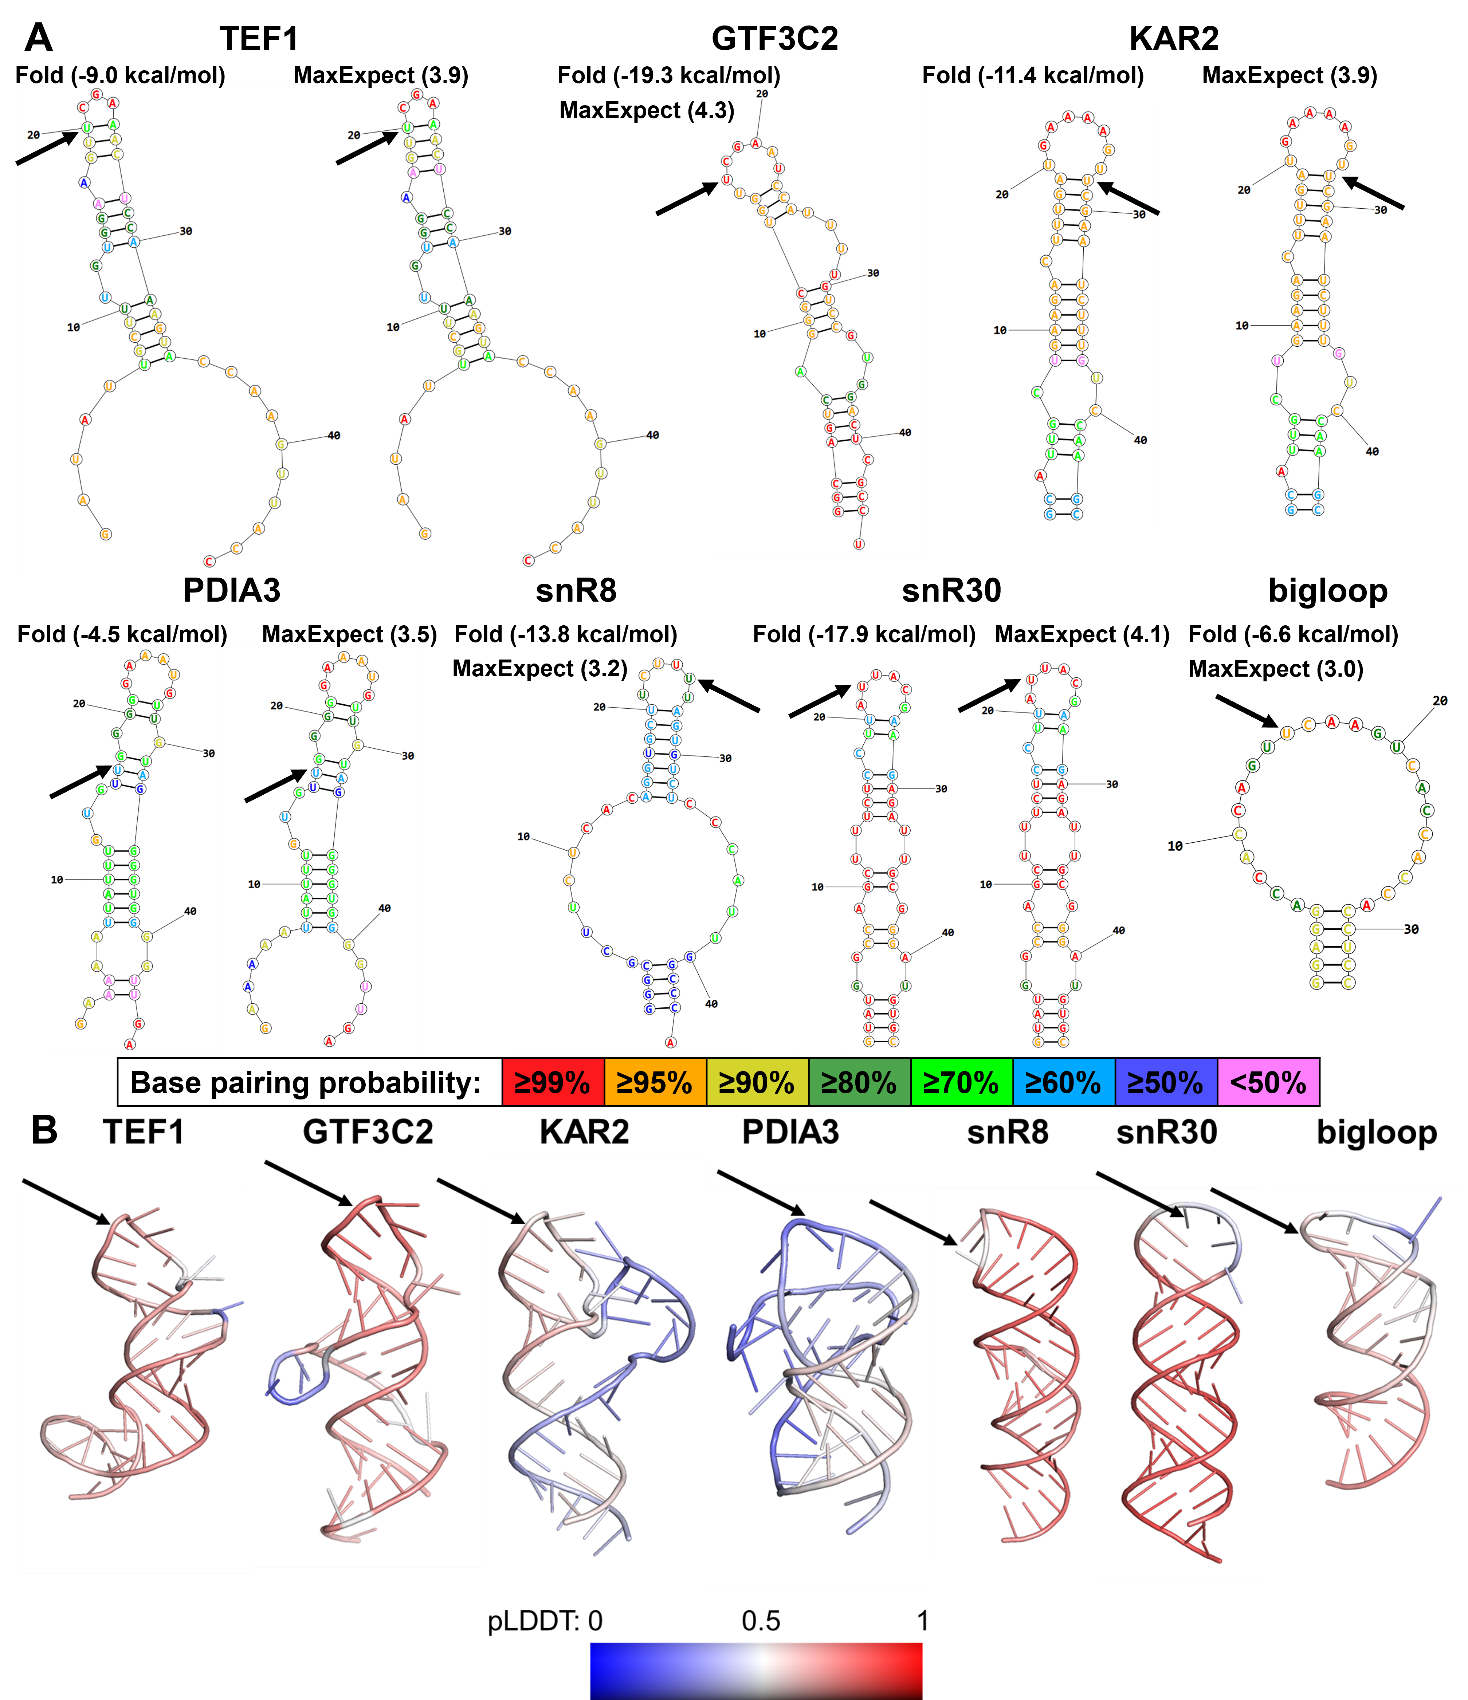


**Supplementary Figure 9. Predicted 3D structures of mRNA/snRNA derived substrates.** (*A*) Predicted secondary structure of mRNA/snRNA derived substrates using the Fold and MaxExpect algorithms from the RNAStructure web server (Reuter and Mathews 2010). If both algorithms predicted the same structure, only one structure is shown. Bases are colored by base pairing probability and the arrow indicates the site of expected pseudouridylation. The theoretical free energy of the fold predicted by the Fold calculation is displayed in addition to the MaxExpect score (Lu et al. 2009). (*B*) Tertiary structures of mRNA/snRNA based variants predicted with Boltz-2(Passaro et al. 2025). The predictions are colored by confidence score (pLDDT).


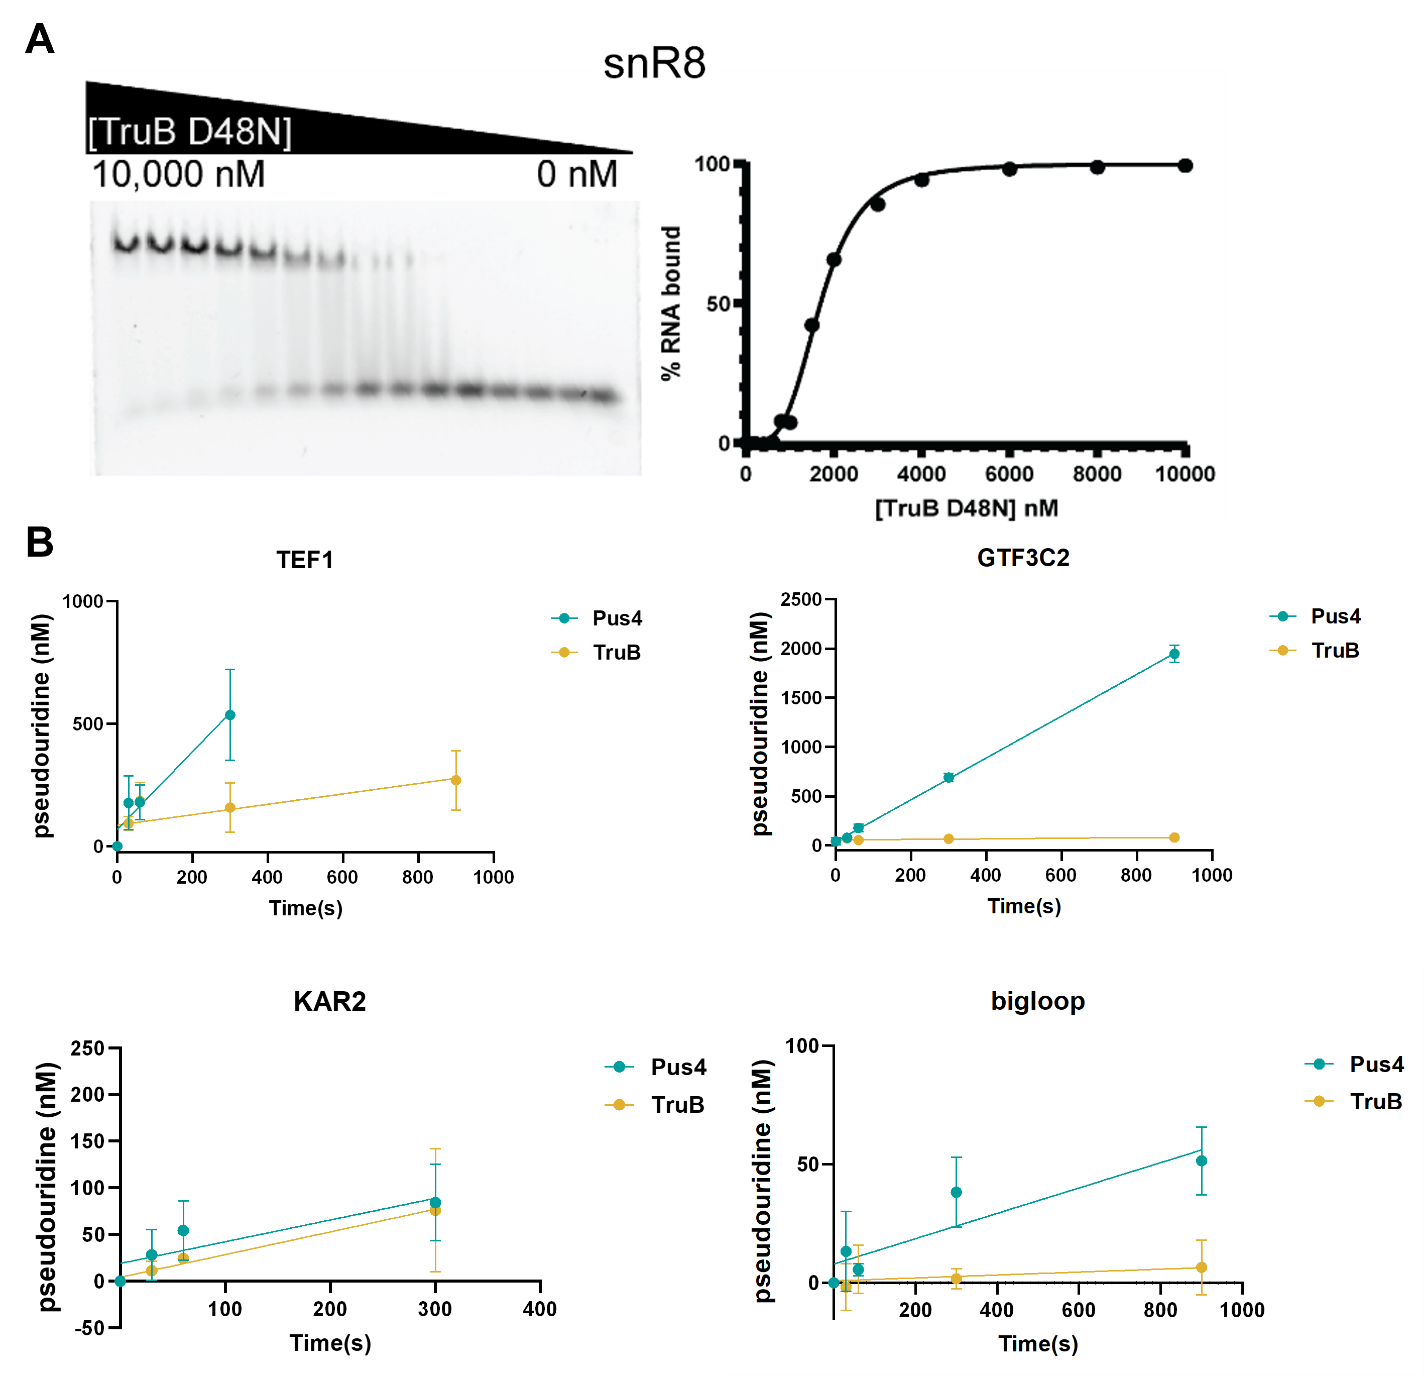


**Supplementary Figure 10. Pus4 more efficiently modifies mRNA and snRNA-based substrates.** (*A*) EMSA for TruB binding to snR8. (*B*) Multiple turnover kinetics traces for RNAs shown in Figure 4.


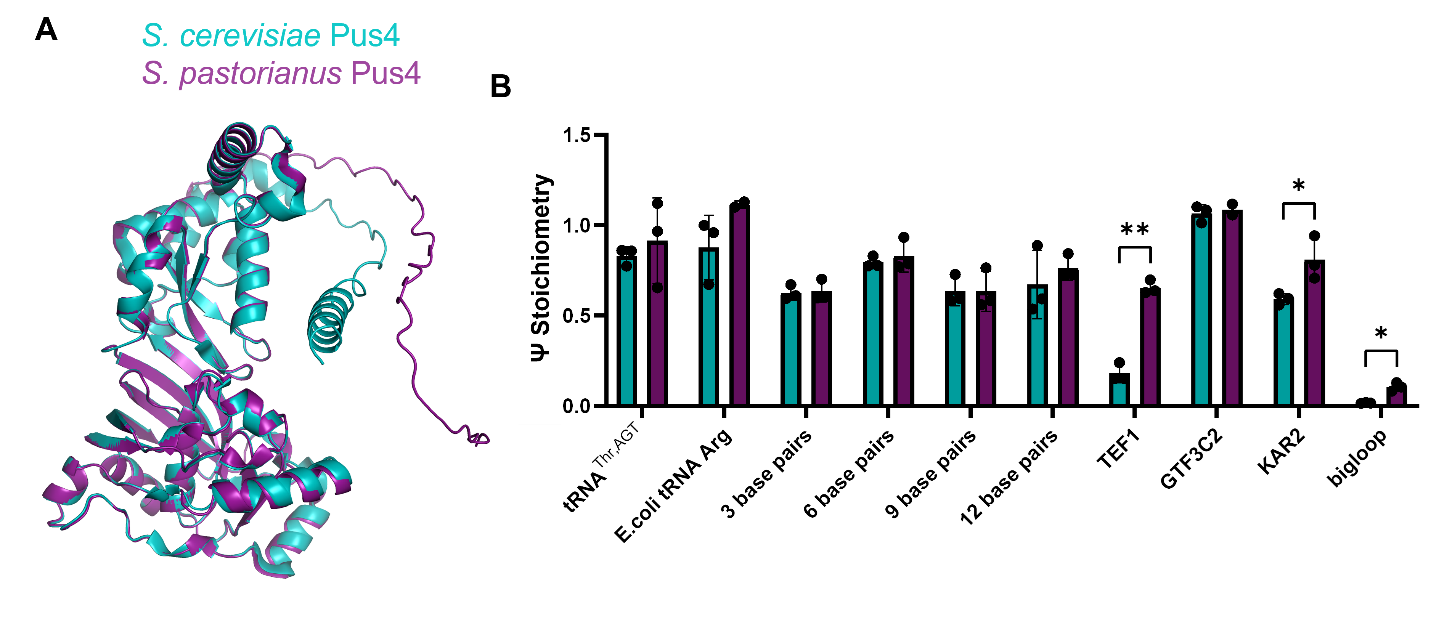


**Supplementary Figure 11. *S. pastorianus* Pus4 has similar activity to *S. cerevisiae* Pus4ΔC52**. (*A*) Comparison of AlphaFold 3 (Abramson et al. 2024) predictions of full length *S. cerevisiae* Pus4 and *S. pastorianus* Pus4. (*B*) Fraction of modification after 30 minutes for *S. cerevisiae* Pus4 ΔC52 (teal) and *S. pastorianus* Pus4 (purple) on stem length variants, displayed as the mean ± SD. The Ψ/U ratio was detected via LC-MS/MS, and the fraction of modification at one site was calculated. * = p < 0.05, ** = p < 0.01 as determined by a t-test (unpaired, two-tailed).


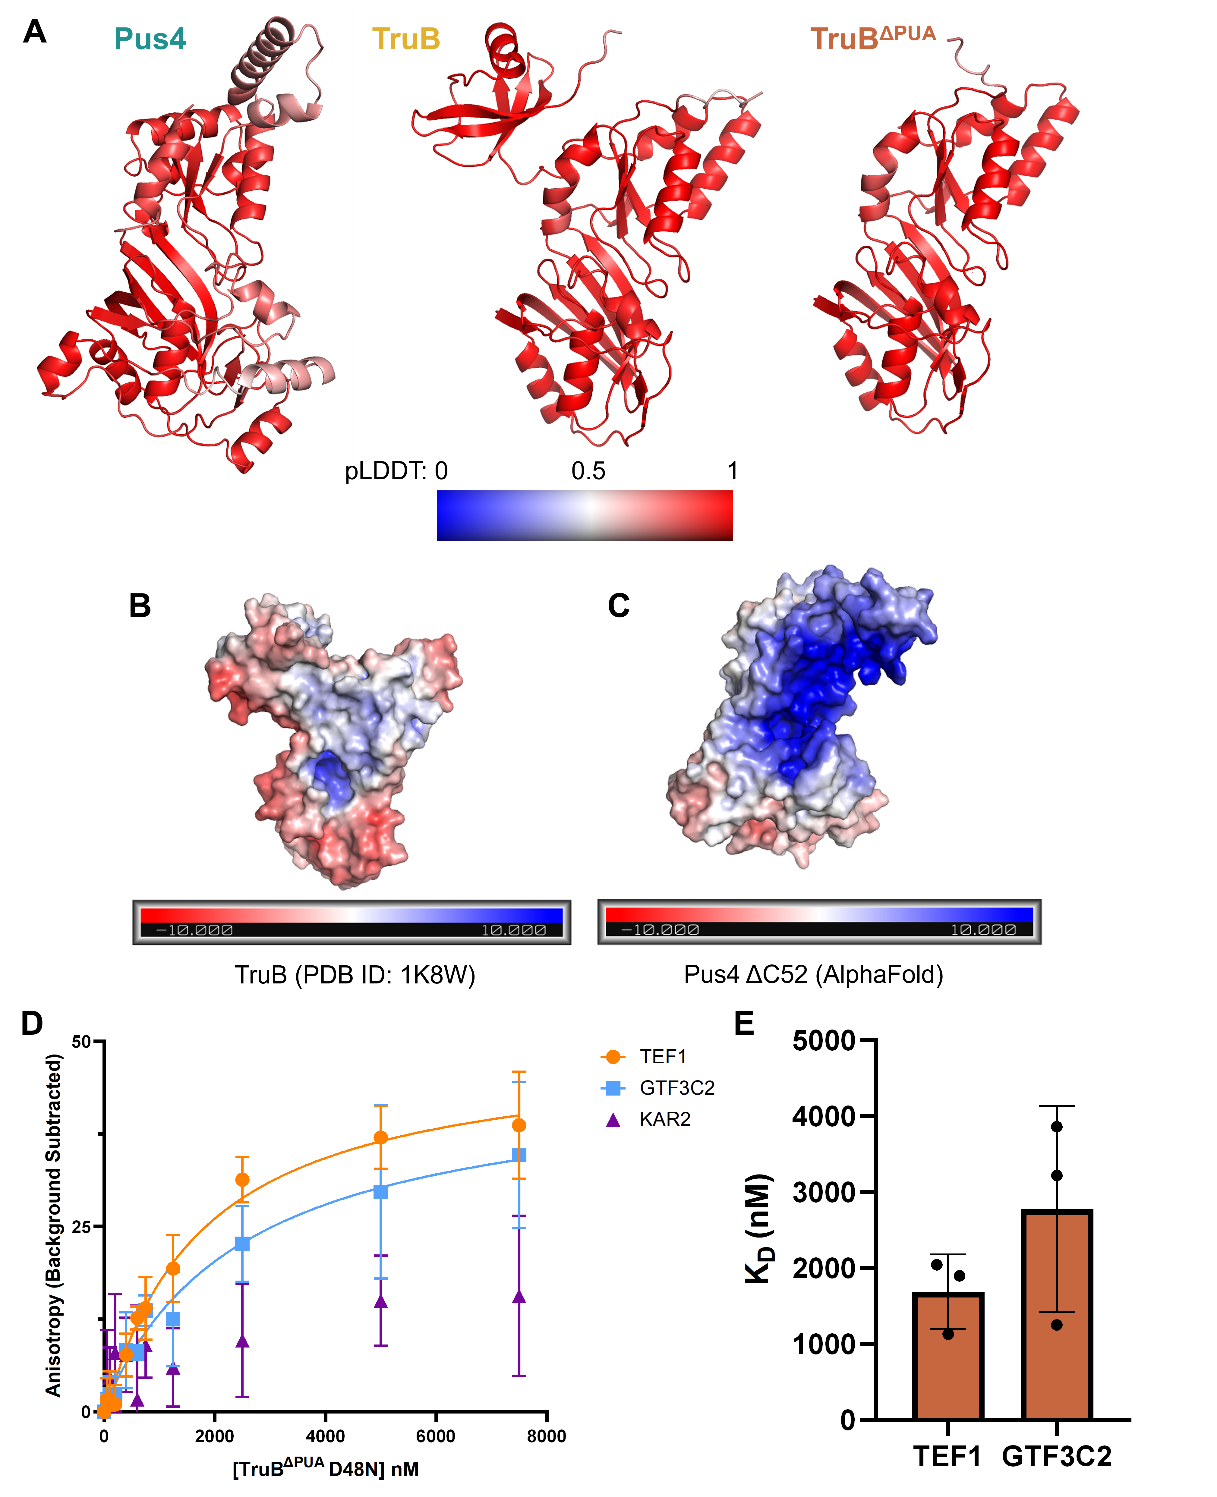


**Supplementary Figure 12. The PUA domain is important for binding some substrates.** (*A*) AlphaFold 3 predictions of Pus4, TruB, and TruBΔPUA (Abramson et al. 2024). Each prediction is colored by confidence score (pLDDT). (*B*) Electrostatics of TruB (1K8W) calculated by APBS (Jurrus et al. 2018). (*C*) Electrostatics of the Pus4 ΔC52 AlphaFold prediction, calculated by APBS (Jurrus et al. 2018). (*D*) FP curves for TruBΔPUA D48N binding to TEF1, GTF3C2, and KAR2. (*E*) KDs determined by FP for TruBΔPUA D48N, displayed as the mean ± SD.


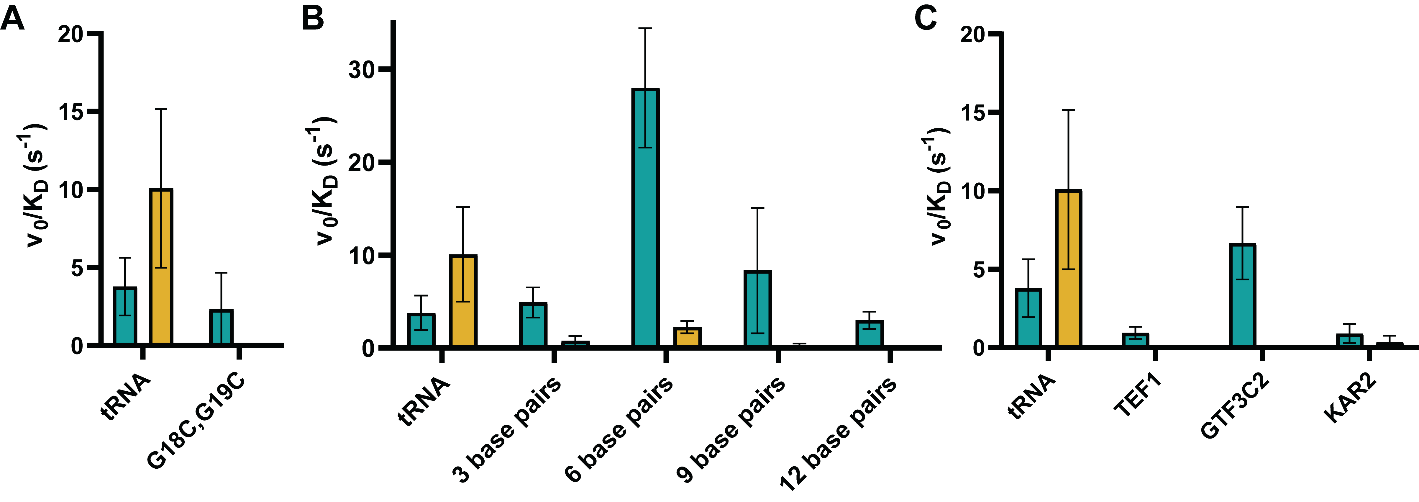


**Supplementary Figure 13. Pus4 modifies non-tRNA substrates more efficiently than TruB.** Approximations of enzyme efficiency for Pus4 (teal) and TruB (gold) determined by dividing initial velocities (determined at 12.5 µM RNA) by KDs for a *E. coli* tRNAArg, ACG and the S. cerevisiae tRNAThr,AGT G18C G19C point mutation (*A*), stem length variants (*B*), and mRNA-bases substrates (*C*).

**Supplementary Tables**

**Supplementary Table 1. KDs for all RNAs in this study for Pus4 and TruB.** Pus4 KDs were determined by electrophoretic mobility shift assays. The Hill equation was used when a single phase binding curve was observed, and the One specific + n nonspecific equation was used when a biphasic binding curve was observed.

| RNA | Pus4 KD,app1 (nM) | Equation used to fit Pus4 data | nh |
| --- | --- | --- | --- |
| *S. cerevisiae* tRNAThr,AGT | 220 ± 30 | One specific + n nonspecific | 5.4 ± 4.1 |
| *S. cerevisiae* tRNAThr,AGT U55C | 440 ± 240 | One specific + n nonspecific | 5.6 ± 3.8 |
| *S. cerevisiae* tRNAThr,AGT G18C, G19C | 240 ± 56 | One specific + n nonspecific | 6.6 ± 2.4 |
| *S. cerevisiae* tRNAThr,AGT no D-loop | 310 ± 56 | One specific + n nonspecific | 7.8 ± 0.3 |
| *S. cerevisiae* tRNAThr,AGT no ASL | 300 ± 23 | Hill equation | 6.8 ± 1 |
| *S. cerevisiae* tRNAThr.AGT no D-loop or ASL | 360 ± 54 | Hill Equation | 6.2 ± 1/9 |
| *S. cerevisiae* tRNAThr,AGT no Acceptor stem | 540 ± 410 | One specific + n nonspecific | 8 ± 0 |
| 3 base pairs | 310 ± 100 | Hill Equation | 2.7 ± 1.3 |
| 6 base pairs | 270 ± 61 | Hill Equation | 7 ± 2.9 |
| 9 base pairs | 290 ± 46 | Hill Equation | 7.9 ± 5.5 |
| 12 base pairs | 270 ± 47 | Hill Equation | 5.1 ± 1.4 |
| 12 base pairs (weak) | 330 ± 71 | Hill Equation | 5.3 ± 2.2 |
| TEF1 | 1700 ± 480 | One specific + n nonspecific | 7.4 ± 2.3 |
| GTF3C2 | 320 ± 110 | Hill Equation | 6.3 ± 4.6 |
| KAR2 | 370 ± 140 | One specific + n nonspecific | 5.3 ± 3.4 |
| PDIA3 | 320 ± 50 | Hill Equation | 1.8 ± 0.5 |
| snR8 | 640 ± 300 | One specific + n nonspecific | 10 ± 0 |
| snR30 | 380 ± 33 | Hill Equation | 13.8 ± 15.3 |

**Supplementary Table 2. TruB KDs for all RNAs in this study.** TruB KDs were determined by fluorescence polarization (FP, n=3) for all RNAs, and for some RNAs a KD with an electrophorectic mobility shift assay (EMSA, n=1) was also measured. FP KDs were fit to a one-site binding equation, whereas EMSAs were fit to the Hill Equation.

| RNA | FP KD (nM) |
| --- | --- |
| *S. cerevisiae* tRNAThr,AGT | 410 ± 180 |
| *S. cerevisiae* tRNAThr,AGT U55C | 80 ± 43 |
| *S. cerevisiae* tRNAThr,AGT G18C, G19C | 29 ± 4 |
| *S. cerevisiae* tRNAThr,AGT no D-loop | 190 ± 120 |
| *S. cerevisiae* tRNAThr,AGT no ASL | 93 ± 47 |
| *S. cerevisiae* tRNAThr.AGT no D-loop or ASL | 780 ± 220 |
| *S. cerevisiae* tRNAThr,AGT no Acceptor stem | 1400 ± 83 |
| 3 base pairs | 1500 ± 880 |
| 6 base pairs | 1300 ± 200 |
| 9 base pairs | 3900 ± 500 |
| 12 base pairs | nd |
| 12 base pairs (weak) | 2500 ± 390 |
| TEF1 | 4200 ± 920 |
| GTF3C2 | 3100 ± 1900 |
| KAR2 | 710 ± 260 |
| PDIA3 | 1400 ± 120 |
| snR8 | 4600 ± 1100 |
| snR30 | 2120 ± 1300 |

**Supplementary Table 3. RNA sequences used in this study.** The U expected to be modified is underlined and bolded.

| RNA | Sequence |
| --- | --- |
| *E. coli* tRNA Arg,ACG | GCAUCCGUAGCUCAGCUGGAUAGAGUACUCGGCUACGAACCGAGCGGUCGGAGGU**U**CGAAUCCUCCCGGAUGCACCA |
| *S. cerevisiae* tRNAThr,AGT | GCUUCUAUGGCCAAGUUGGUAAGGCGCCACACUAGUAAUGUGGAGAUCAUCGGU**U**CAAAUCCGAUUGGAAGCA |
| *S. cerevisiae* tRNAThr,AGT U55C | GCUUCUAUGGCCAAGUUGGUAAGGCGCCACACUAGUAAUGUGGAGAUCAUCGGU**C**CAAAUCCGAUUGGAAGCA |
| *S. cerevisiae* tRNAThr,AGT G18C, G19C | GCUUCUAUGGCCAAGUUCCUAAGGCGCCACACUAGUAAUGUGGAGAUCAUCGGU**U**CAAAUCCGAUUGGAAGCA |
| *S. cerevisiae* tRNAThr,AGT no D loop | GCUUCUAUGAAACGCCACACUAGUAAUGUGGAGAUCAUCGGU**U**CAAAUCCGAUUGGAAGCA |
| *S. cerevisiae* tRNAThr,AGT no ASL | GCUUCUAUGGCCAAGUUGGUAAGGCGAGAUCAUCGGU**U**CAAAUCCGAUUGGAAGCA |
| *S. cerevisiae* tRNAThr,AGT no D loop or ASL | GCUUCUAAUCGGU**U**CAAAUCCGAUUGGAAGCA |
| *S. cerevisiae* tRNAThr,AGT no Acceptor stem | GGCCAAGUUGGUAAGGCGCCACACUAGUAAUGUGGAGAUCAUCGGU**U**CAAAUCCGAU |
| 3 base pairs | GCCGUGACCGGGU**U**CAAUUCCCAAACGCGGC |
| 6 base pairs | GCCGUGACGGGGU**U**CAAUUCCCCGUAGAGGC |
| 9 base pairs | GCCGUGACGGGGU**U**CAAUUCCCCGUCGCAAA |
| 12 base pairs | GCCGUGACGGGGU**U**CAAUUCCCCGUCGCGGC |
| 12 base pairs (weak) | GAAAUGAAGAAGU**U**CAAUUCUUCUUCGUUUC |
| TEF1 | GAUAUUGCUUUGUGGAAGU**U**CGAAACUCCAAAGUACCAAGUUACC |
| GTF3C2 | GGCAGUCAGGGCUGGU**U**CGAAUCCAUUUUGUCCGUGGACUCGCCU |
| KAR2 | GCAUUGCUGAAGACUUUGAUGAAAAGU**U**CGAAUCUUUGUCCAAGC |
| PDIA3 | GAAAAAUUAUUUGUGUUGGGGGAAAUGU**U**GUAGGGGUGGGGUUGA |
| snR8 | GGGCGCUUCUCACAGGUGCUUCUU**U**UAGUGUCUCCCAUUGGCCCA |
| snR30 | GUAUGGCCAGCUUUCUCCUUA**U**UACGAAGAGAUUGCGGGAUGUGC |
| bigloop | GGAGGACCACCAGU**U**CAAGUCACCACCACCUCC |
